# Supplementary material
Source: PubMed Central journal article supplement (PMC4197583)

## Supplementary Figure Legends

**Fig. S1. PQBP1 and WBP11 sequence comparisons.** **A.** Alignment of PQBP1 protein sequences of human (*Homo sapiens*, *Hs*), mouse (*Mus musculus*, *Mm*), *Xenopus laevis* (*Xl*) homeologs a and b, zebrafish (*Danio rerio*, *Dr*) and Starlet sea anemone (*Nematostella vectensis*, *Nv*). Shading indicates homology (black 80–100%, grey 60–80%). WW: WW domain, PRD: polar amino acid rich domain, NLS: nuclear localization signal, CTD: C-terminal conserved domain. The additional polar amino acid-rich tail highly conserved among species is marked by wavy line. **B.** Alignment of WBP11 protein sequences of human (*Hs*), mouse (*Mm*), *Xenopus laevis* (*Xl*) homeologs a and b, and zebrafish (*Dr*). Shading indicates homology (black 80–100%, grey 60–80%).

**Fig. S2. Expression profile of *pqbp1* and *wbp11* mRNA during embryogenesis.** Total RNA extracted from indicated developmental stages of *X. laevis* was used for qPCR analysis. The results were normalized to *ornithine decarboxylase* (ODC) levels and plotted relative to the level measured in the stage 35 embryos (set as 1.0).

**Fig. S3. Expression of *pqbp1* and *wbp11* in neurula stage embryos.** Whole mount *in situ* hybridization with indicated probes on embryos that were longitudinally sectioned (A) or cross-sectioned (B) stage 18 embryos. S: sense probe of *pqbp1*. Both *pqbp1* and *wbp11* transcripts are localized to ventro-lateral neural tube cells (B).

**Fig. S4. Over-expression of PQBP1 inhibits normal specification and movement of dorsal mesoderm.** Embryos at the end of gastrulation, stage 13, that had been dorsally injected at the 2-cell stage with 1 ng *pqbp1* mRNA, were analyzed by *in situ* hybridization with *brachyury* (*bra*) and *chordin* (*chd*) probes.

**Fig. S5. Partial rescue of neural folding defects in PQBP1 morphants by *pqbp1* mRNA.** **A.** PQ MO1 (40 ng) was dorsally injected with either 2 ng *b-galactosidase* (*b-gal*) or *pqbp1* (PQ) mRNA. **B.** Fraction of embryos displaying specific phenotypes: closed, partially closed or open neural folds (NF).

**Fig. S6. *Xenopus* WBP11 interacts with PQBP1.** **A.** Co-immunoprecipitation (co-IP) of PQBP1 and WBP11 from COS1 cells transfected with HA-tagged PQBP1 (HA-PQ) and myc-tagged WBP11 (myc-WB). Cell lysates were immunoprecipitated (IP) with an anti-myc antibody, followed by immunoblotting with an anti-HA antibody to detect PQBP1 bound to WBP11, or vice versa. TCL: total

cell lysate. **B.** Co-immunostaining of myc-tagged WBP11 (myc-WB) and HA-tagged PQBP1 (HA-PQ) expressed in COS1 cells. Nuclei were stained with DAPI.

**Fig. S7. Validation of *pqbp1* knockdown effects on *fgf4* and *cdx4* expression in *X. laevis* and *X. tropicalis* embryos.** Results were analyzed and plotted as described in Fig. 5. **A-C.** Expression of *fgf4* and *cdx4* was analyzed by qPCR. **A.** Either of the PQBP1 MOs (at 50 ng) reduced the expression of *fgf4* and *cdx4* in *X. laevis* morphant embryos, \*P < 0.05 or \*\*P < 0.01, with comparisons to control embryos (CT). **B.** Reduced *fgf4* and *cdx4* expression in embryos injected with 30 ng *pqbp1* MO at the 4-cell stage into the VMZ was rescued by co-injection of MO-resistant PQBP1 mRNA (0.4 ng or 2 ng) but not control *b-gal* mRNA (-); \*P < 0.05 or \*\*P < 0.01, with comparisons to MO-only injected embryos (-). **C.** Analysis of PQBP1 knockdown in *X. tropicalis* embryos. *X. tropicalis* PQBP1 MO (20 ng) was bilaterally injected into embryos at the 2-cell stage, and phenotypes of stage-matched wild type (WT) embryo (left panel) and MO-injected embryos (middle panel) are shown. Expression of *fgf4* and *cdx4* were evaluated in WT and *pqbp1* morphant *X. tropicalis* at the gastrula stage (right panel), as described in Fig. 5; \*P < 0.05 or \*\*P < 0.01, with comparisons to control embryos (CT).

**Fig. S8. Expression profile of different FGF receptors in *Xenopus* embryos.** **A.** Total RNA was extracted from early neurula stage embryos, followed by Lightcycler qPCR (27 cycles) with each receptor-specific primer set, and amplification products were visualized by gel electrophoresis. **B.** Expression profile of FGF receptors in morphant gastrula stage embryos by qPCR. Samples were prepared and analyzed as per Fig. 5. Relative *fgfr* expression levels were calculated from the “crossing point” (CP) of qPCR cycle numbers for each primer set, using a common standard curve generated from *fgfr1IIIb* control embryo cDNA dilution series, and normalized to levels of *odc* transcripts. Bar graphs indicate the relative expression level of receptor transcripts in embryos injected with 150 ng control (CT), 100 ng *pqbp1* (PQ), 50 ng *wbp11* (BP), and combined *pqbp1* and *wbp11* (PQ+BP) MOs. Mean values for triplicate biological experiments are plotted; bars indicate standard error. Note, although expression levels of *fgfr1IIIc* and *fgfr3IIIb* transcripts appear nearly zero, they were detected in gel-based and qPCR.

**Table S1. PCR Primers**

| Gene target         |   | Primer sequence            |
|---------------------|---|----------------------------|
| <i>odc</i>          | U | GCCATTGTGAAGACTCTCTCC      |
|                     | D | TTCGGGTGATTCTTGCCAC        |
| <i>wnt8</i>         | U | AGATGACGGCATTCCAGA         |
|                     | D | TCTCCCGATATCTCAGGA         |
| <i>fgf4</i>         | U | CTTTCTTTCCAGAGAAACGACACCG  |
|                     | D | AACTCACGACTCCAACTTCCACTG   |
| <i>fgf4</i> 5'UTR   | U | ACCTCCTCTGGGAGCTAAGCAGT    |
|                     | D | TGGAAAGAAAGCGGCAGGCACT     |
| <i>cdx4</i>         | U | TCTCCTCATCCATCTGGGACTG     |
|                     | D | AGTTCTGTCTTCCGCCTGATAGTG   |
| <i>fgf8</i>         | U | ATCACCTCCATCCTGGGCTATC     |
|                     | D | TGCGAACTCTGCTTCCAAACG      |
| <i>brachyury</i>    | U | TTCTGAAGGTGAGCATGTCG       |
|                     | D | GTTTGACTTTGCTAAAAGAGACAGG  |
| <i>siamois</i>      | U | CTGTCCTACAAGAGACTCTG       |
|                     | D | TGTTGACTGCAGACTGTTGA       |
| <i>sizzled</i>      | U | CACACAAGACAGTCTTGGAAGCTTTC |
|                     | D | CACCAGCAATAACATACTGTGGG    |
| <i>mix.2</i>        | U | TGCAAGCCATCATTATTCTAGC     |
|                     | D | AGGAACCTCTGCCTCGAGACAT     |
| <i>apod</i> (veg T) | U | TGGATTAGTTTAGGAACA         |
|                     | D | CGGATCTTACACTGAGGA         |
| <i>sox2</i>         | U | GATCAGTATGTACCTACCTGG      |
|                     | D | AGTGGAGAGCCACAGTTTGTC      |
| <i>chordin</i>      | U | AACTGCCAGGACTGGATGGT       |
|                     | D | GGCAGGATTTAGAGTTGCTTC      |
| <i>noggin</i>       | U | AGTTGCAGATGTGGCTCT         |
|                     | D | AGTCCAAGAGTCTGAGCA         |
| <i>goosecoid</i>    | U | TTCACCGATGAACAACTGGA       |

|                  |   |                           |
|------------------|---|---------------------------|
|                  | D | TTCCACTTTTGGGCATTTTC      |
| <i>trop odc</i>  | U | ACAAGCTGTCTCAGATGCAC      |
|                  | D | GCTCAGCAATGATGGTCACT      |
| <i>trop fgf4</i> | U | GCAACGTGGGCATCGGGTTTCA    |
|                  | D | TCCATACAGCTTCCCCTTTGCATTC |
| <i>trop cdx4</i> | U | AGCTGCCAACTCACCCAGCGAT    |
|                  | D | TCCAGCTCCAGCCTCTGATGGT    |

**Table S2. PCR Primers for FGFR**

| Gene target       |   | Primer sequence             |
|-------------------|---|-----------------------------|
| <i>fgfr1 ex7</i>  | U | TGGCCTCGGATGGCTTCCCGTAT     |
| <i>fgfr1 ex8a</i> | D | CGCAGACTGATTGGCCTCACCA      |
| <i>fgfr1 ex8b</i> | U | TGGAGTTAGCGGCCAAGCAGGT      |
| <i>fgfr2 ex7</i>  | U | CCACATCCGCTGGGTGCGTTA       |
| <i>fgfr2 ex8a</i> | D | TGCGTCCGCTTCGGTCACATT       |
| <i>fgfr2 ex8b</i> | D | CCAGCATCCTCAAAAGAAACATTCCTG |
| <i>fgfr2 ex8a</i> | U | TCCAGTGCTGAAGTGCTGAAACTG    |
| <i>fgfr2 ex8b</i> | U | ACATTCTGCCTGGTTGACGGT       |
| <i>fgfr2 ex9</i>  | D | TCTTCTTGGCTCCTTGCCGC        |
| <i>fgfr3 ex7</i>  | U | TGGCAGCAAGTACGGCCCAGA       |
| <i>fgfr3 ex8a</i> | D | TGTCCTTCATGGGTCTCGGTCACA    |
| <i>fgfr3 ex8b</i> | D | ACCGTCAGCCAAGCAGTGTGA       |
| <i>fgfr4 ex7</i>  | U | TGGAAGCCATTTTGGCCCTGATGA    |
| <i>fgfr4 ex9</i>  | D | TCTTGACTCTGCTGGCTCGGCT      |

Fig. S1

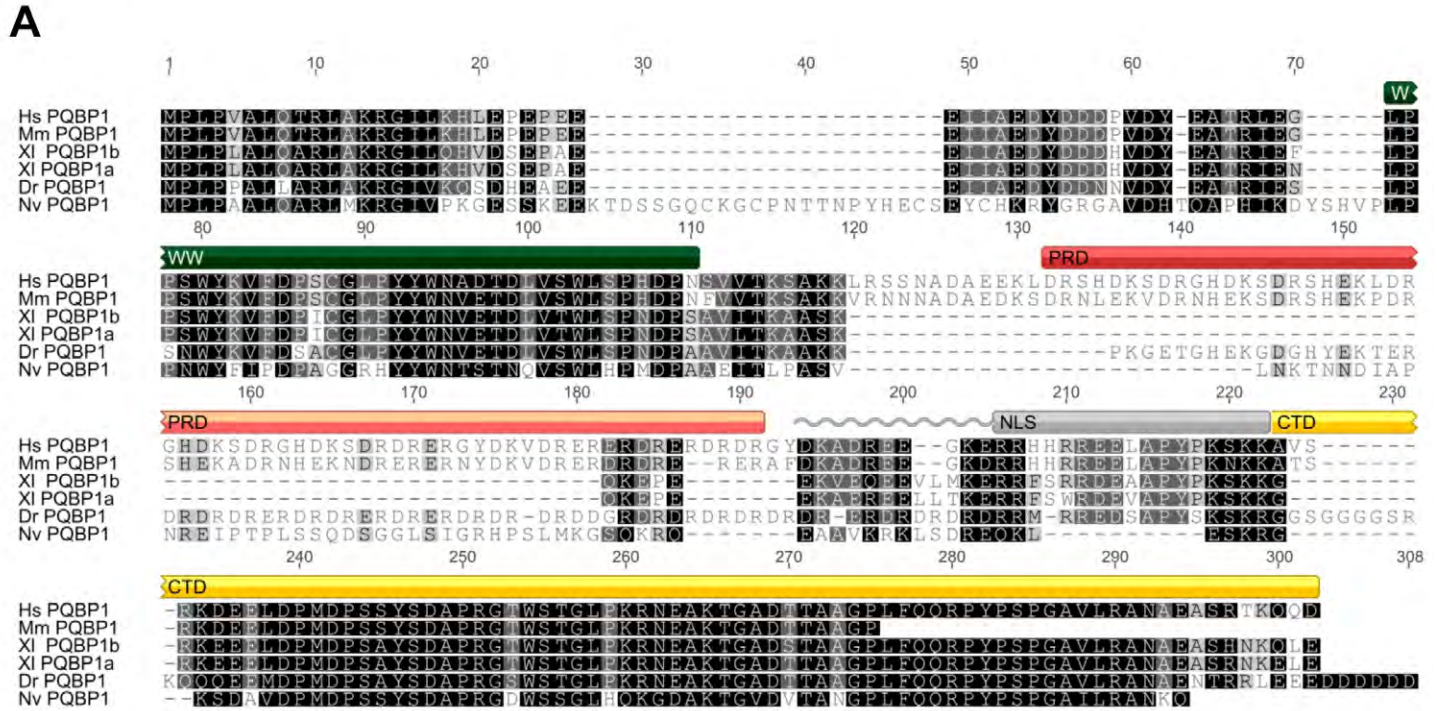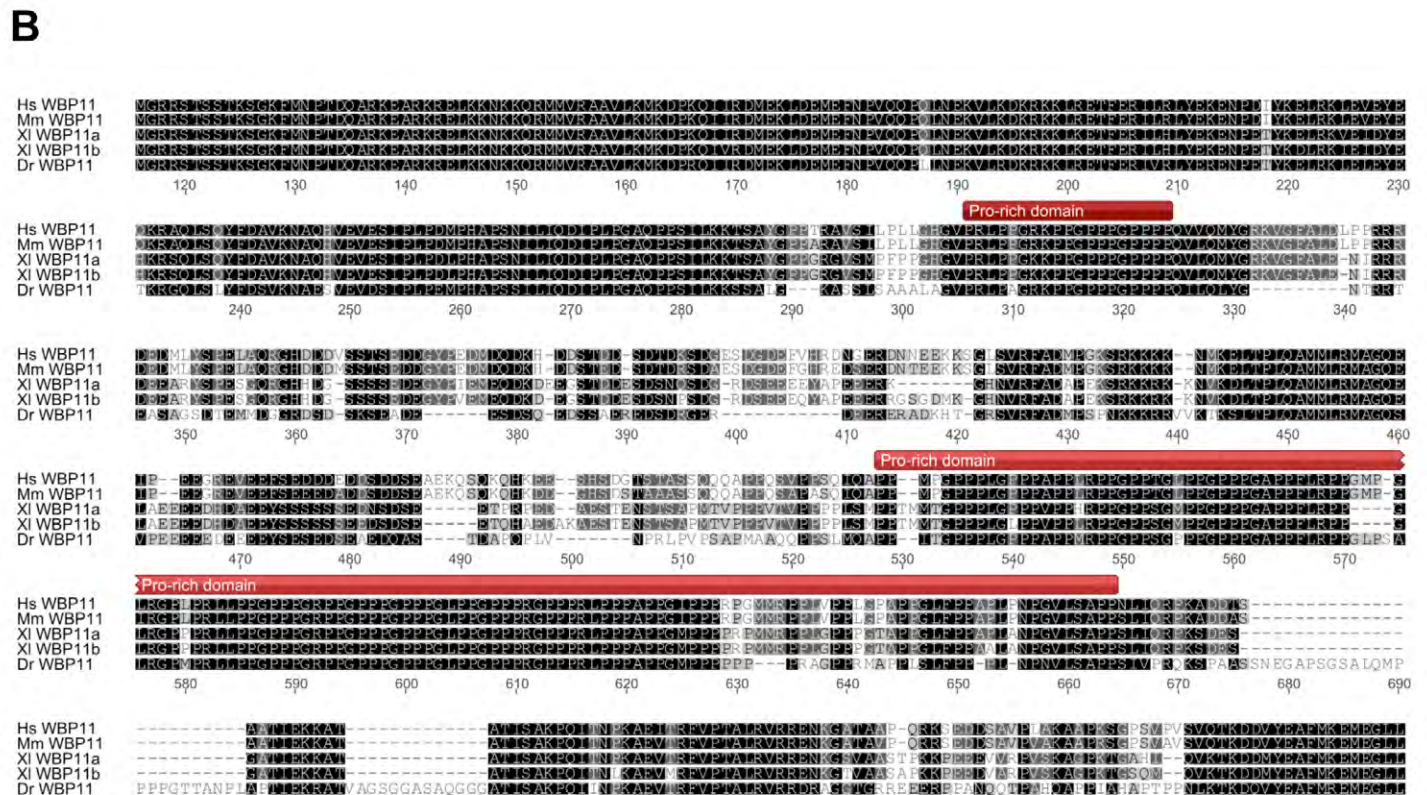

Fig. S2

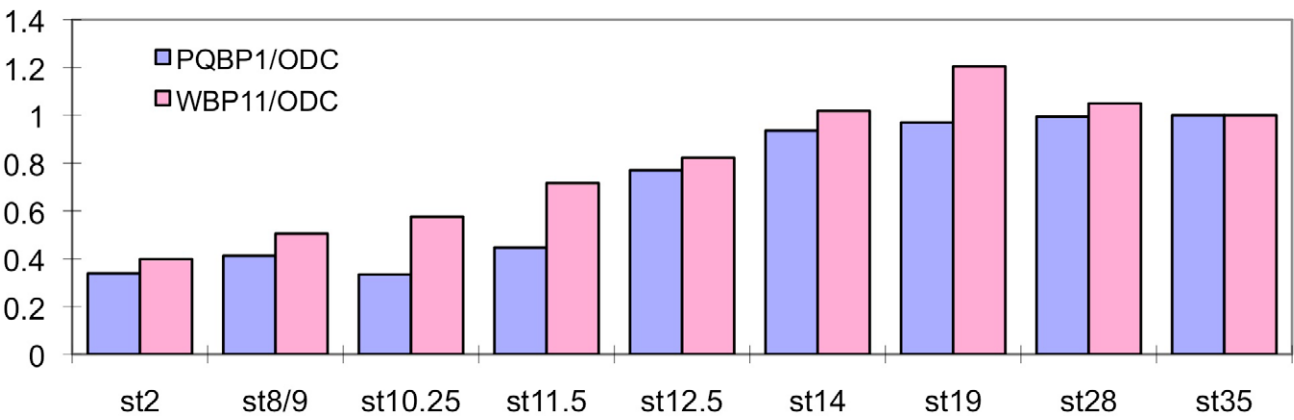

Fig. S3

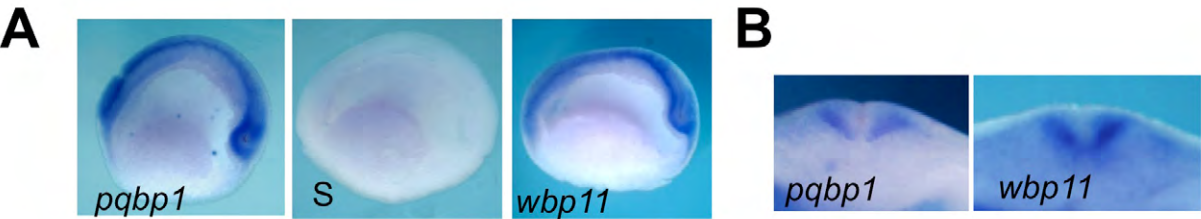

Fig. S4

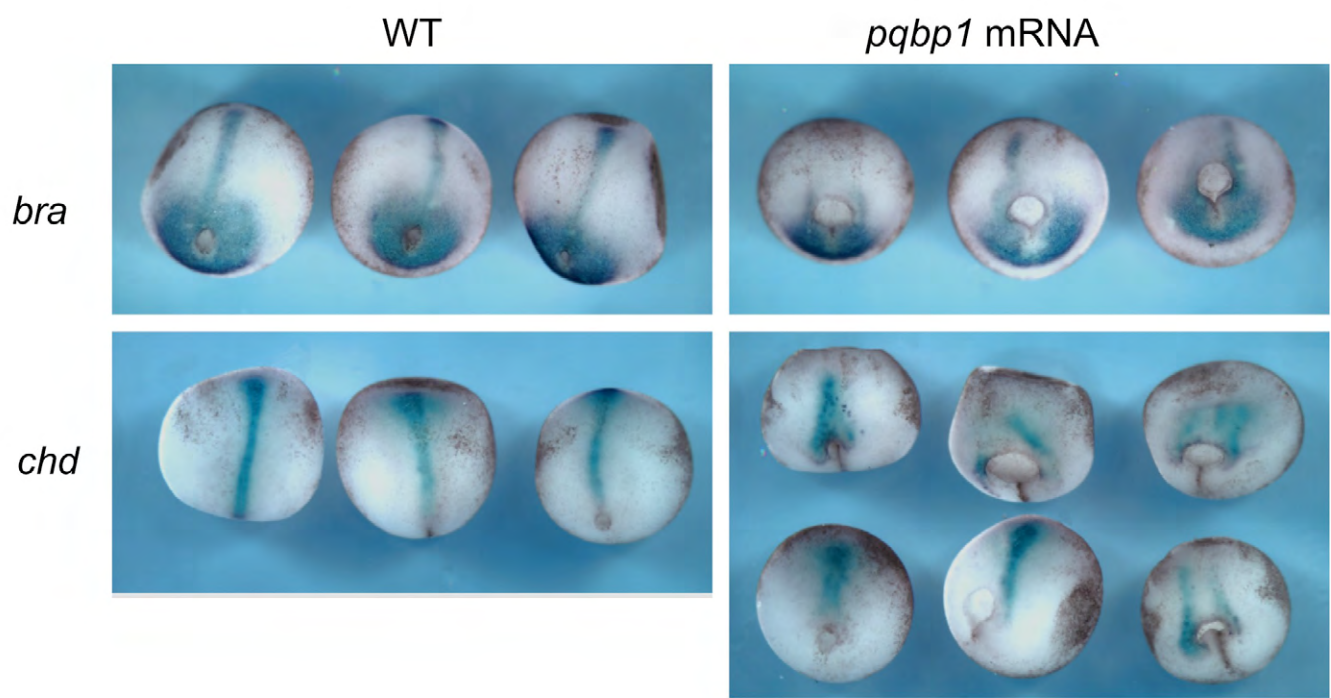

Fig. S5

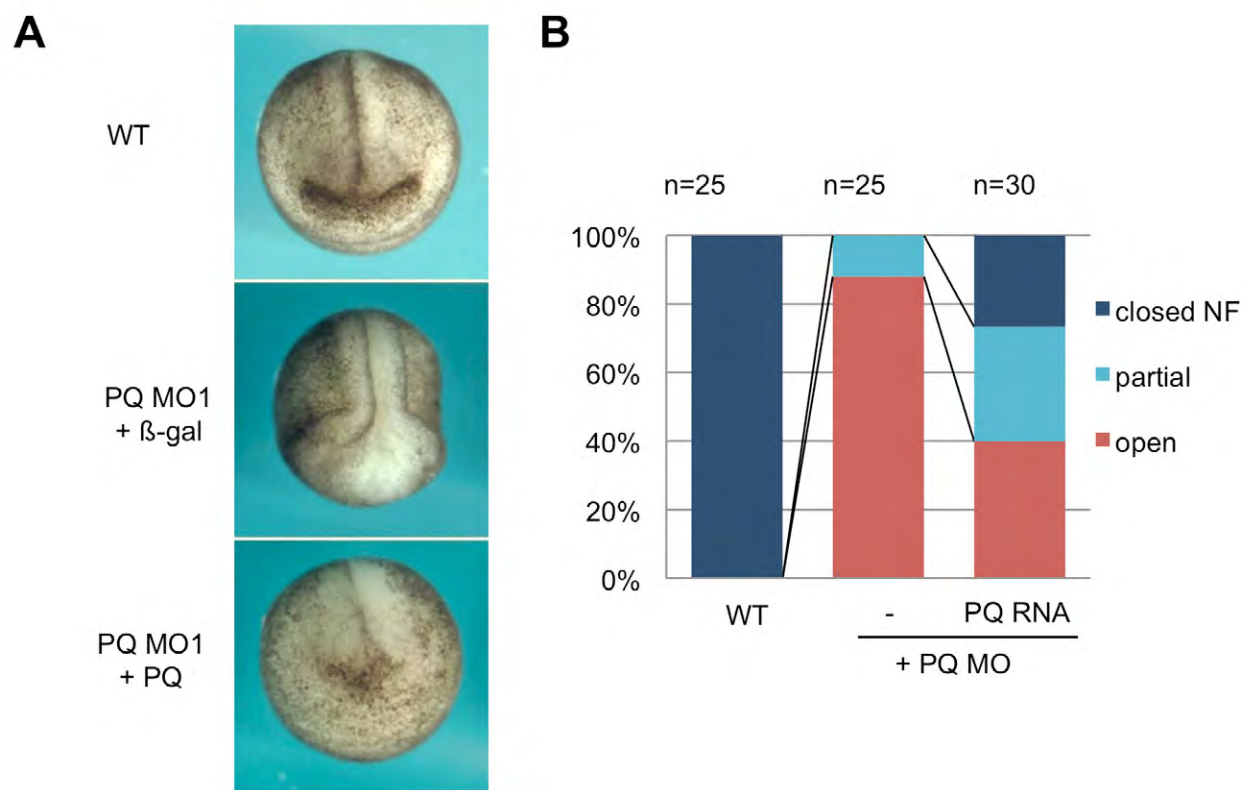

Fig. S6

**A**

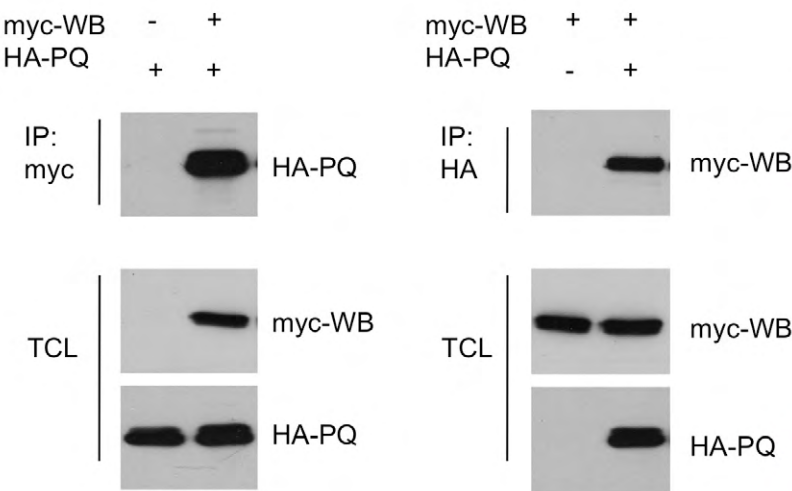

**B**

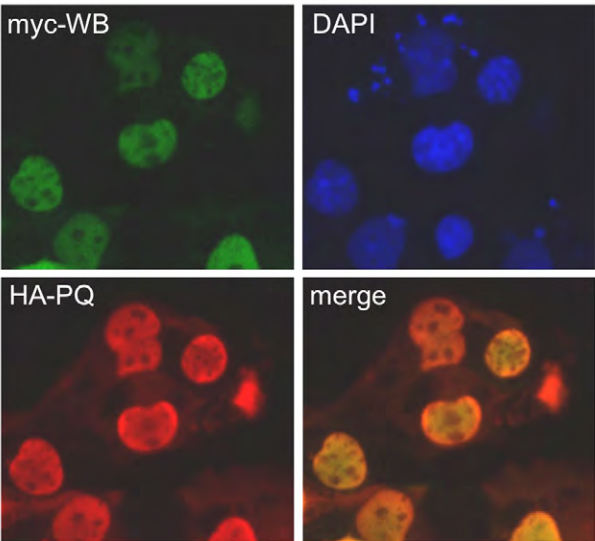

Fig. S7

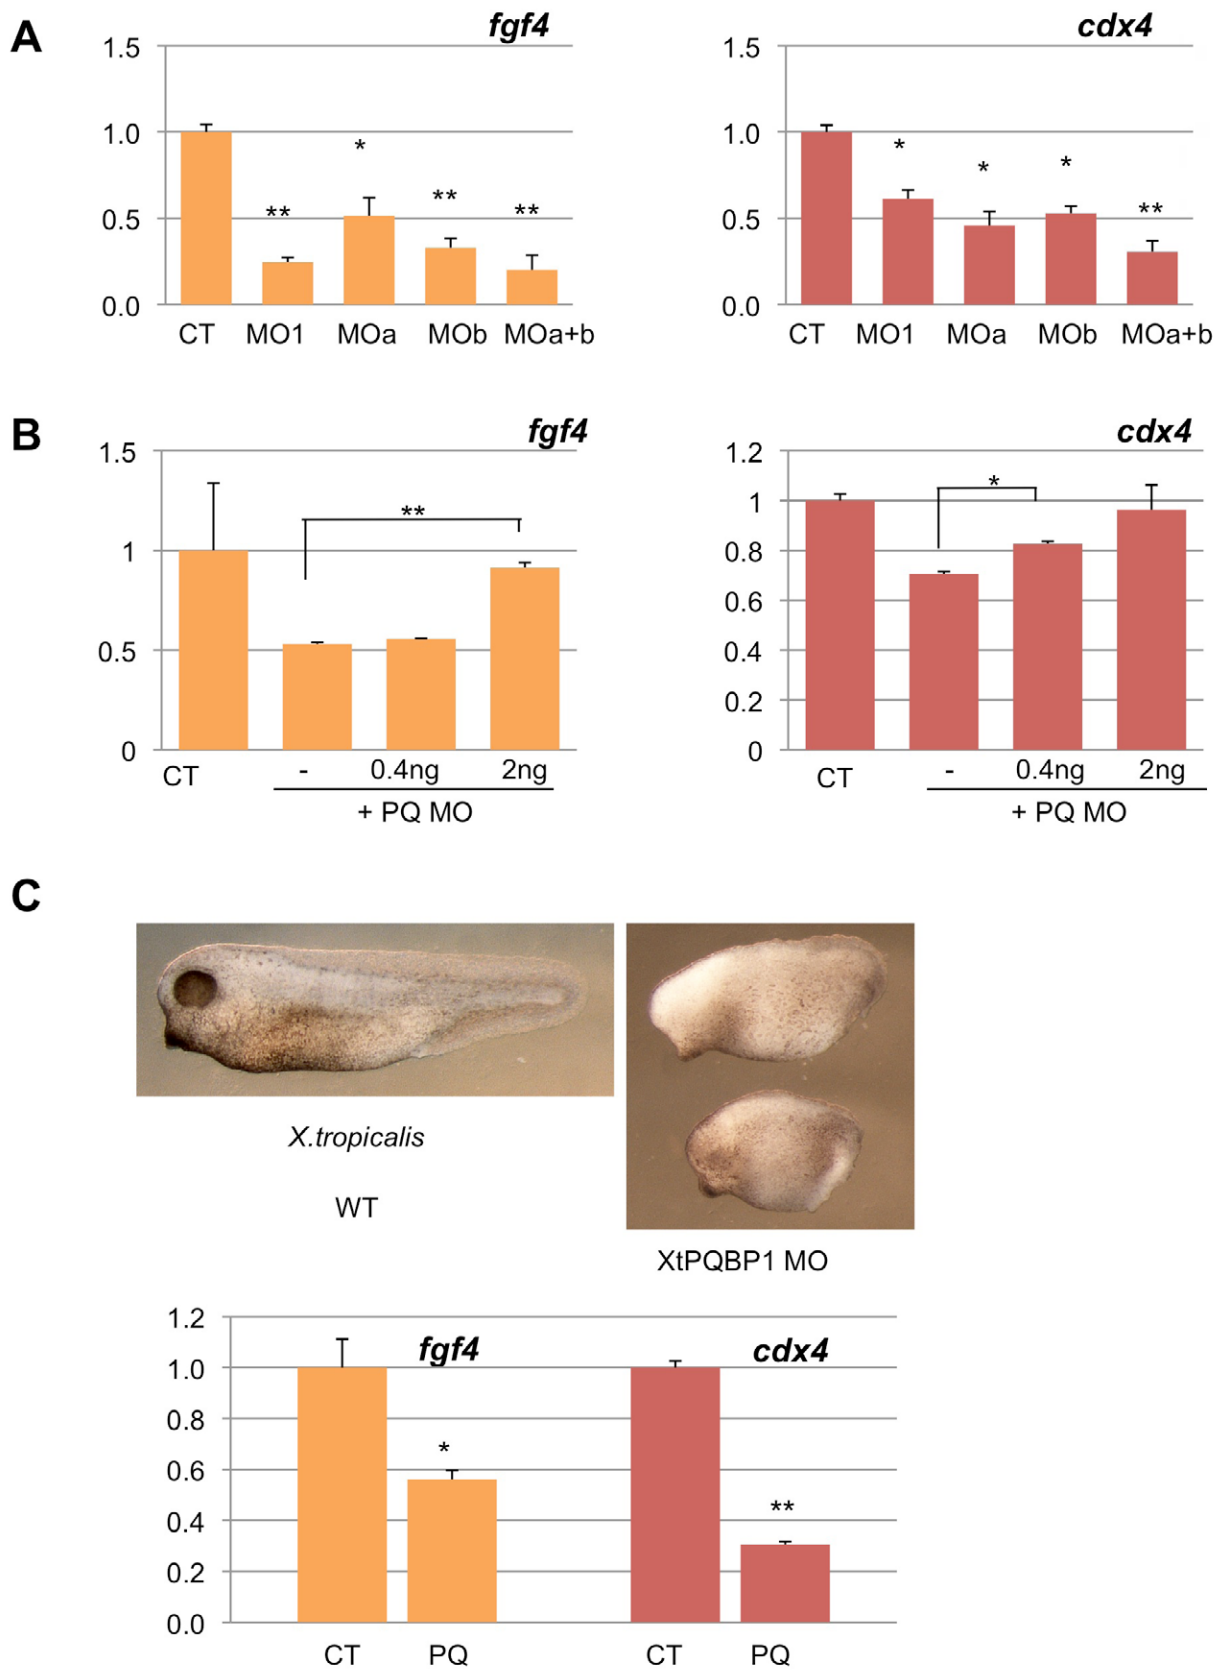

Fig. S8

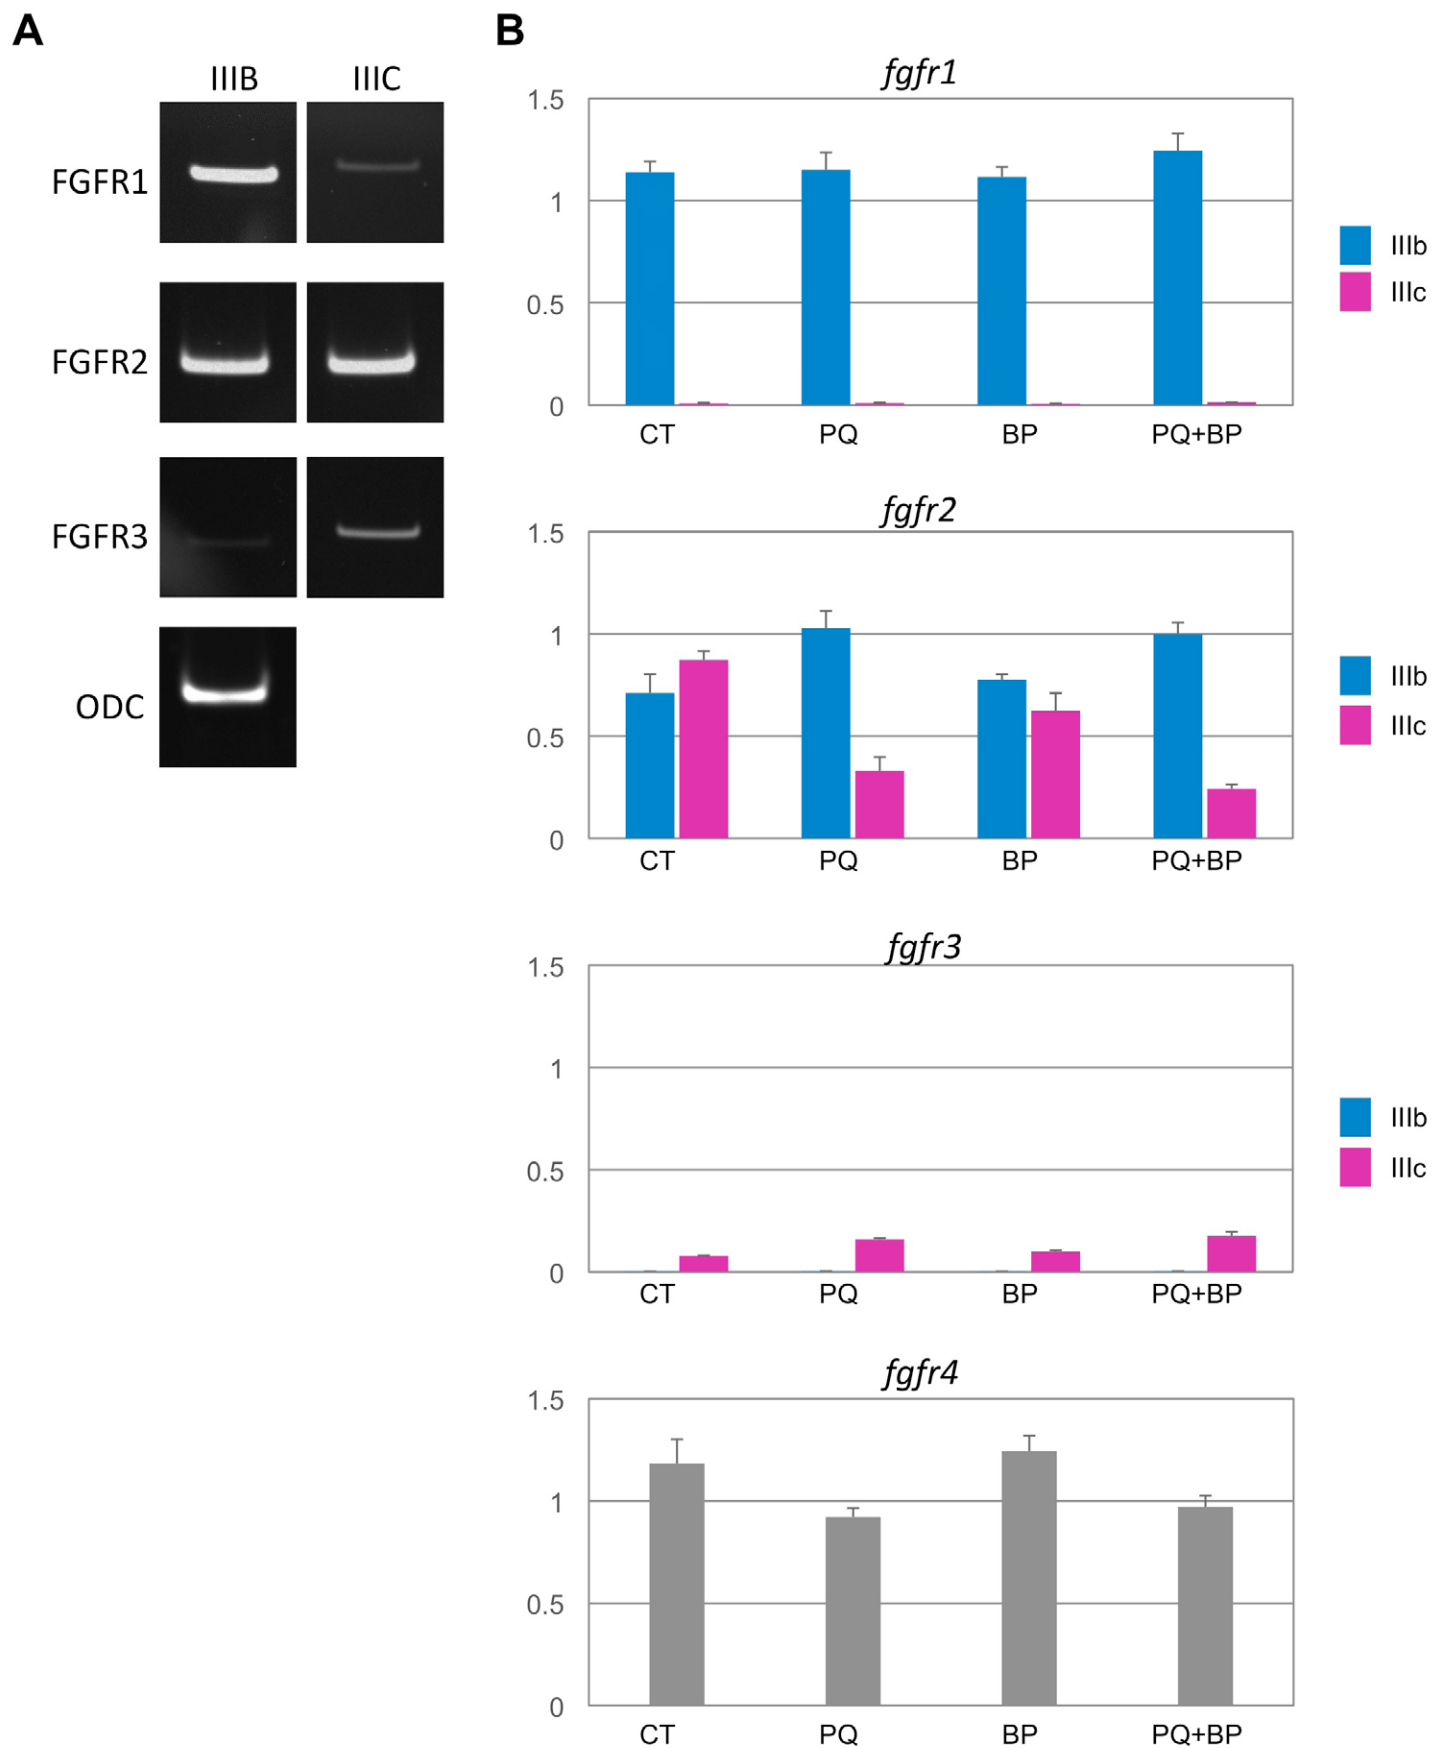

Supplement: supp_dev.106658_DEV106658.pdf [file supp_dev.106658_DEV106658.pdf]
